# Supplementary material for: Inferring Gene Function and Network Organization in Drosophila Signaling by Combined Analysis of Pleiotropy and Epistasis
Source: PubMed Central journal article supplement (PMC3656728; doi:10.1534/g3.113.005710), 2013-05-01
Supplement: supp_g3.113.005710_005710SI.pdf [file supp_g3.113.005710_005710SI.pdf]

**Inferring Gene Function and Network Organization in *Drosophila* Signaling by Combined Analysis of Pleiotropy and Epistasis**

Gregory W. Carter

The Jackson Laboratory  
600 Main Street  
Bar Harbor, ME 04609  
Telephone: 207-288-6025  
Email: [greg.carter@jax.org](mailto:greg.carter@jax.org)

**DOI: 10.1534/g3.113.005710**

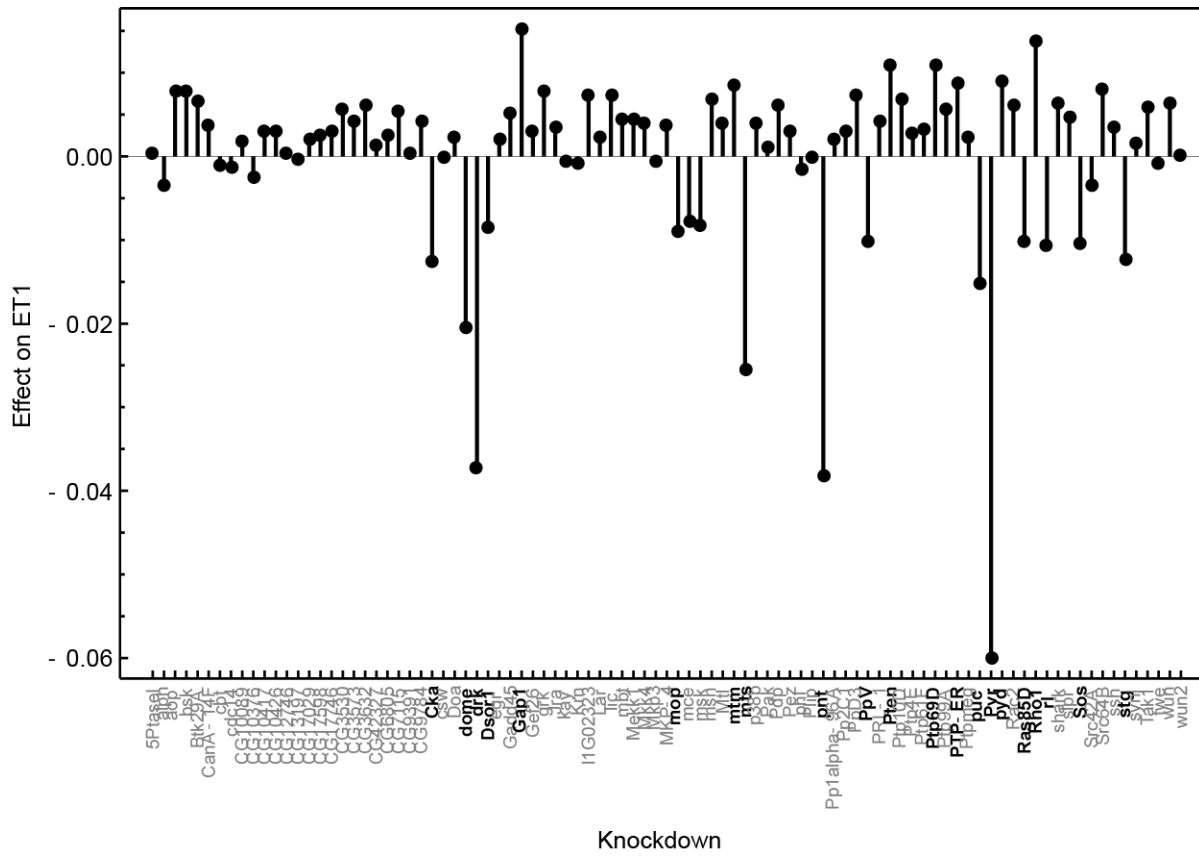

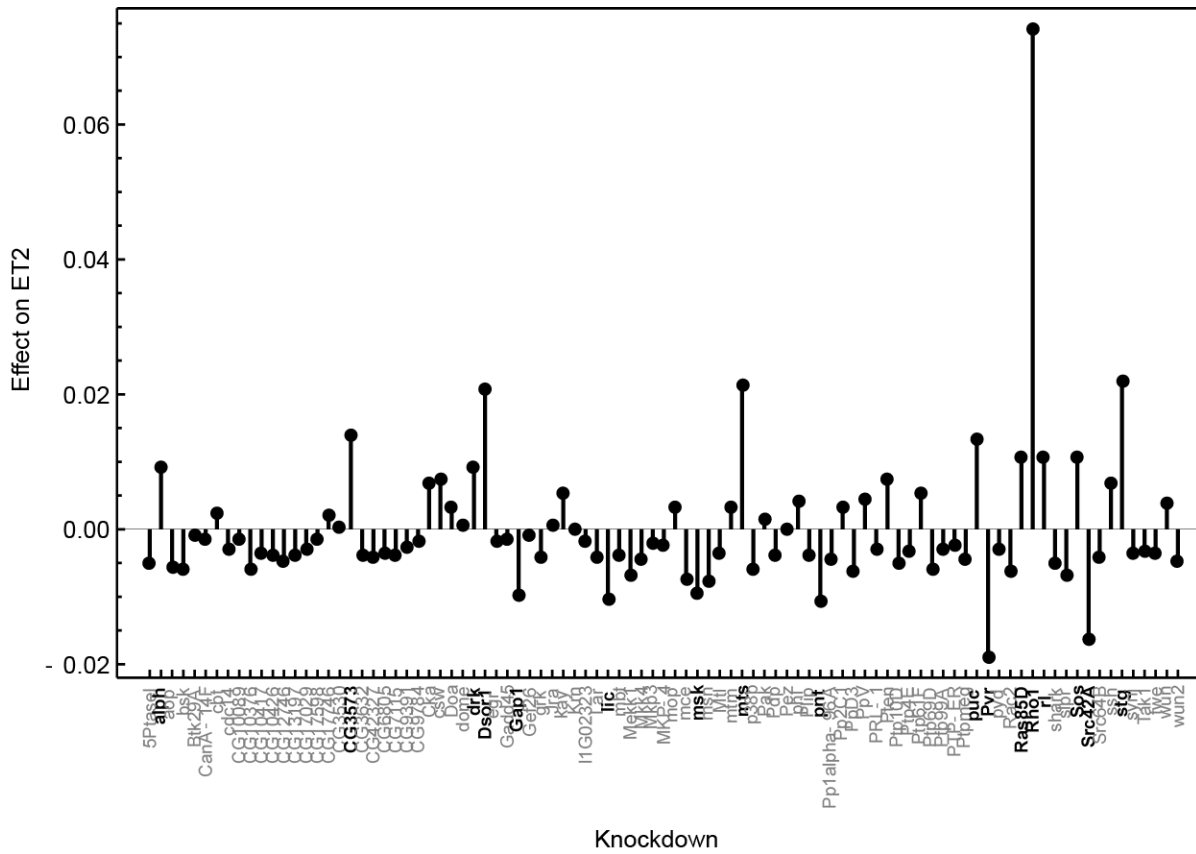

**Figure S2** Main effect coefficients ( $\beta_i^{ET2}$ ) of each gene knockdown for single-locus scans of eigentrait 2 (ET2). Knockdowns with significant effects are labeled in bold.

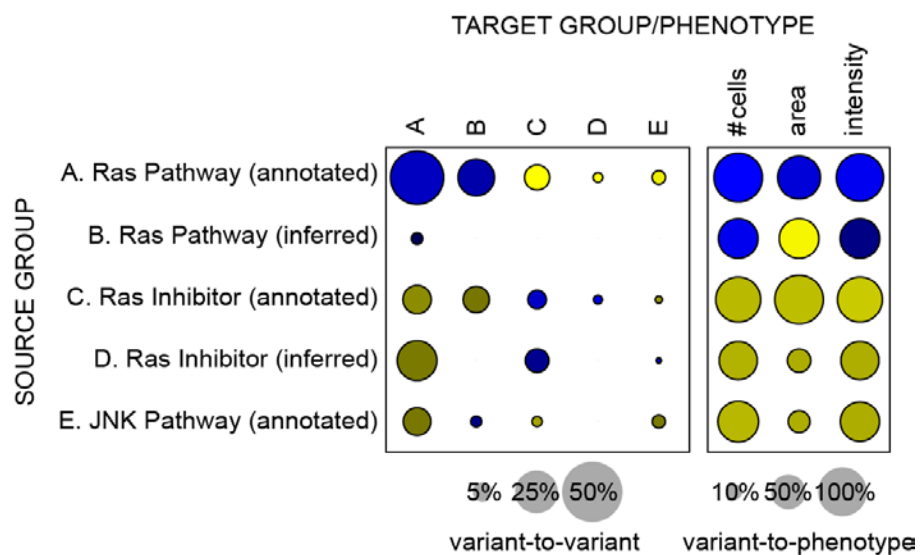

**Figure S3** Median influences from knockdowns in one functional group (rows) to knockdowns in other groups and phenotypes (columns). Disc shading represents positive (yellow) or negative (blue) relative intensity and radius denotes density of observed interactions as a percentage of possible interactions. Ras pathway knockdowns are consistently suppressed by other Ras knockdowns but enhanced by Ras inhibitors.

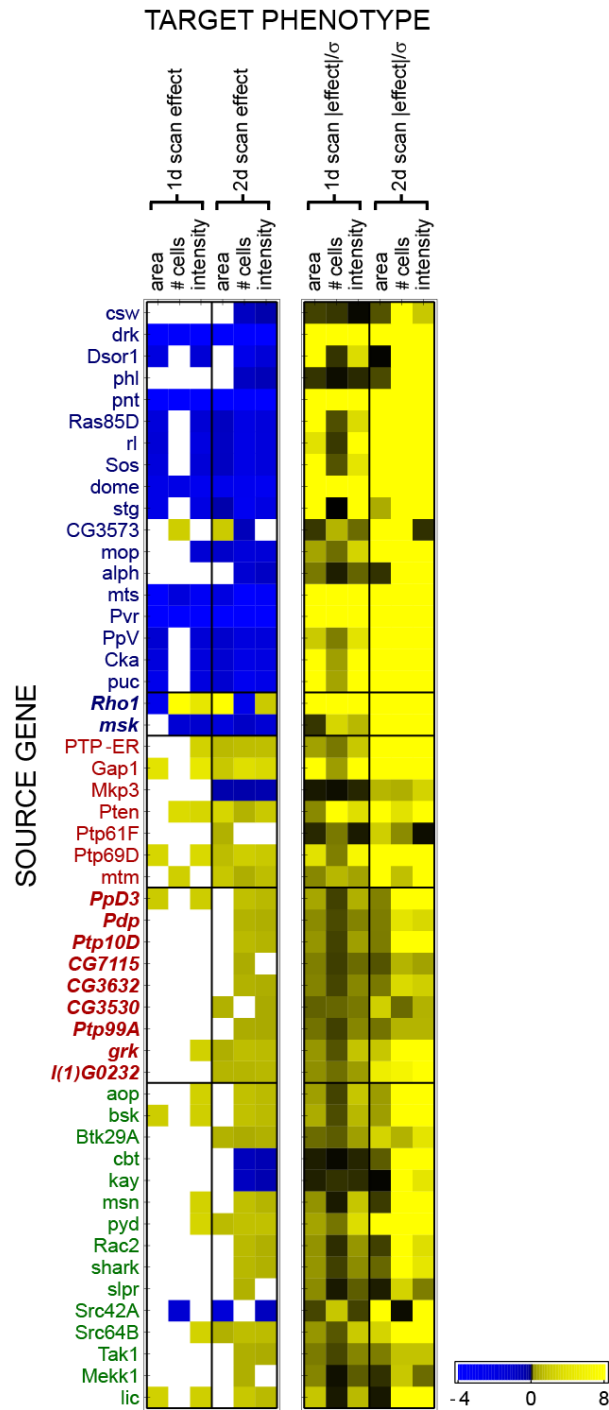

**Figure S4** Adjacency matrices of direct effects (left columns) and significance (right columns; effect size divided by standard error) comparing non-interacting (1d) and interacting (2d) models. Genes are labeled as in Figure 3 and only significant interactions appear in effects (left columns). Interaction scans reveal additional direct influences of gene knockdowns on all three phenotypes by increasing significance of the inferred effects.

**Table S1 Results for all computed influence parameters.**

Table S1 is available for download at <http://www.g3journal.org/lookup/suppl/doi:10.1534/g3.113.005710/-/DC1>
