# Supplementary material for: Inferring Gene Function and Network Organization in Drosophila Signaling by Combined Analysis of Pleiotropy and Epistasis
Source: PubMed Central journal article supplement (PMC3656728; doi:10.1534/g3.113.005710), 2013-05-01
Supplement: supp_g3.113.005710_FigureS2.pdf [file supp_g3.113.005710_FigureS2.pdf]

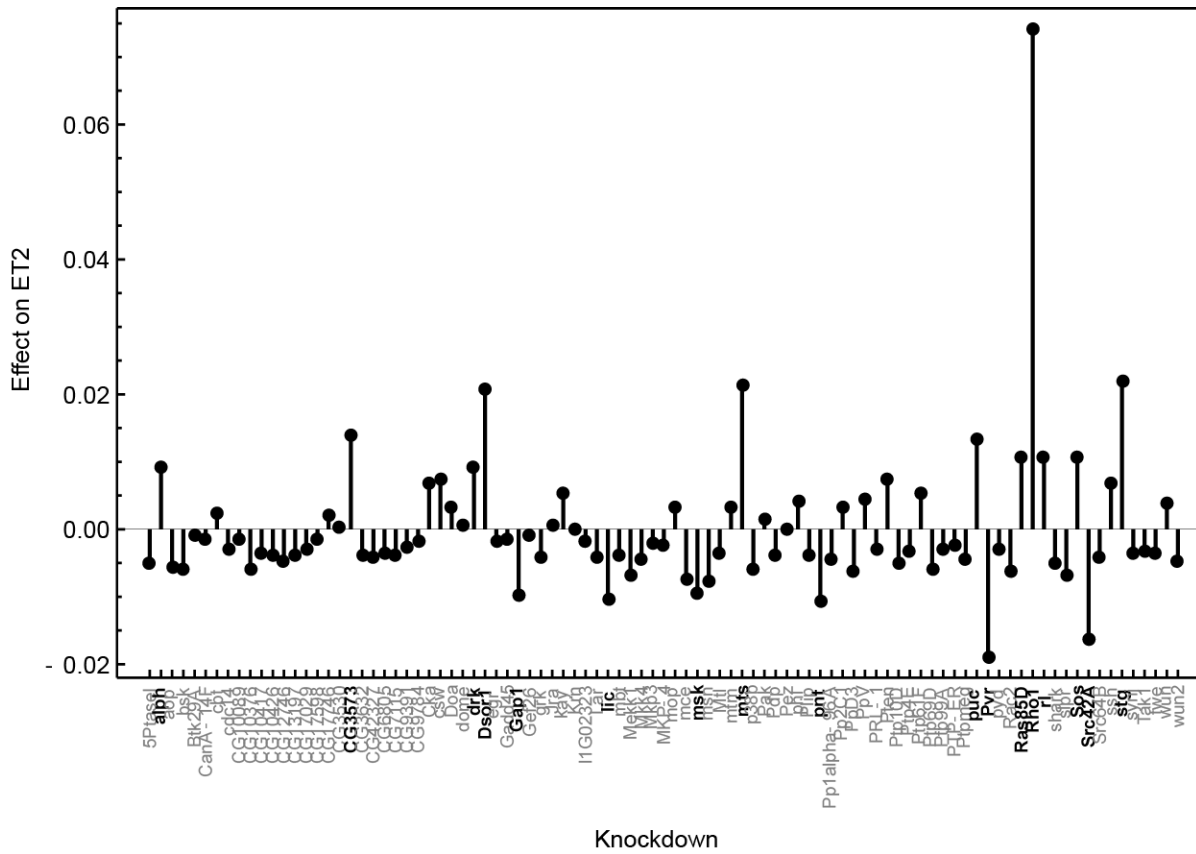

**Figure S2** Main effect coefficients ( $\beta_i^{ET2}$ ) of each gene knockdown for single-locus scans of eigentrait 2 (ET2). Knockdowns with significant effects are labeled in bold.
